# Supplementary material for: Deconstruction of the Ras switching cycle through saturation mutagenesis
Source: PubMed Central journal article supplement (PMC5538825; doi:10.7554/elife.27810), 2017-07-07

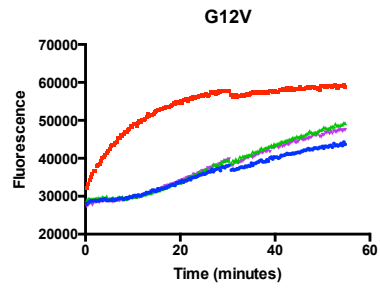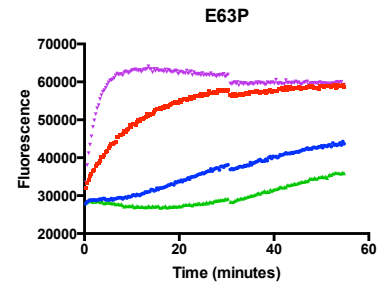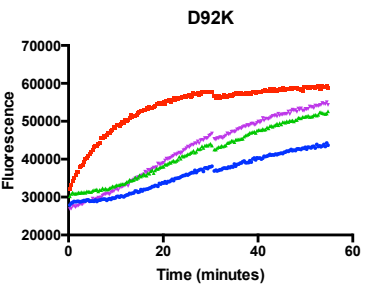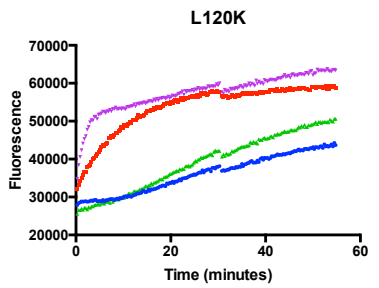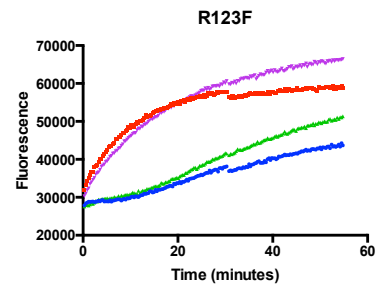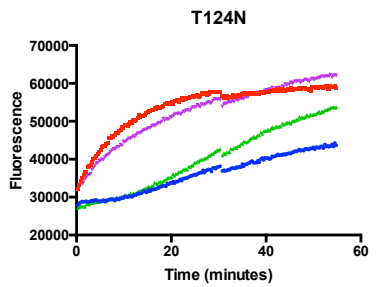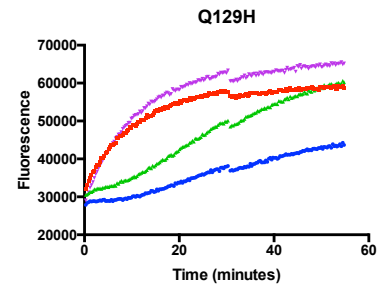

Supplement: elife-27810-fig2-data1.pdf [file elife-27810-fig2-data1.pdf]
